# Supplementary material
Source: PubMed Central journal article supplement (PMC5633000)
Supplement: NIHMS904235-supplement-Supplemental_materials.pdf [file NIHMS904235-supplement-Supplemental_materials.pdf]

**Supplementary Table 1. Search terms.**

| Online database  | Search terms                                                                                                                                                                                                                                                                                                                  |
|------------------|-------------------------------------------------------------------------------------------------------------------------------------------------------------------------------------------------------------------------------------------------------------------------------------------------------------------------------|
| PubMed           | tuberculosis AND (c reactive protein OR CRP) AND English[la] NOT case reports[pt] NOT (animals[mh] NOT humans[mh])                                                                                                                                                                                                            |
| Embase           | 'tuberculosis'/mj OR 'lung tuberculosis'/exp/mj OR tuberculosis:ab,ti AND ('c reactive protein' OR crp:ab,ti) AND [english]/lim NOT ([animals]/lim NOT ([humans]/lim OR 'patient'/exp)) NOT 'case report'/de                                                                                                                  |
| Web of Science   | (#4 NOT #5) AND Language=(English)<br>Databases=SCI-EXPANDED, SSCI, A&HCI Timespan=All years<br>(#4 AND TS=("case report" OR "case reports" OR "report of a case")) AND Language=(English) looked at 7 refs = 0 relevant<br>(#3) AND Language=(English)<br>#1 AND #2<br>TS=("c reactive protein" OR CRP)<br>TS=(tuberculosis) |
| Cochrane Library | tuberculosis:ti,ab,kw and "c reactive protein" or CRP:ti,ab,kw (Word variations have been searched)                                                                                                                                                                                                                           |

**Supplementary Table 2. Characteristics of excluded studies among all studies where additional data was requested from the corresponding author to determine final eligibility<sup>a</sup>:**

| First author, year  | Country            | Reason for exclusion                                                                                                       |
|---------------------|--------------------|----------------------------------------------------------------------------------------------------------------------------|
| <b>Pulmonary TB</b> |                    |                                                                                                                            |
| Agranoff, 2006      | Uganda, The Gambia | Did not provide accuracy data                                                                                              |
| Lee, 2012           | South Korea        | Did not provide accuracy data                                                                                              |
| Ratzinger, 2012     | Austria            | Reference standard not satisfied; additional data provided by the author did not limit TB diagnosis to culture-positive TB |
| Shi, 2013           | China              | Did not provide accuracy data                                                                                              |
| Tintinger, 2012     | South Africa       | Reference standard not satisfied; additional data provided by the author did not limit TB diagnosis to culture-positive TB |

**Abbreviations:** TB (tuberculosis)

**Legend:** <sup>a</sup> All corresponding authors contacted via email.

**Supplementary Figure 1. Inpatient pulmonary tuberculosis study quality using the Quality Assessment of Diagnostic Studies (QUADAS-2) tool.**

**A. Summary study quality.**

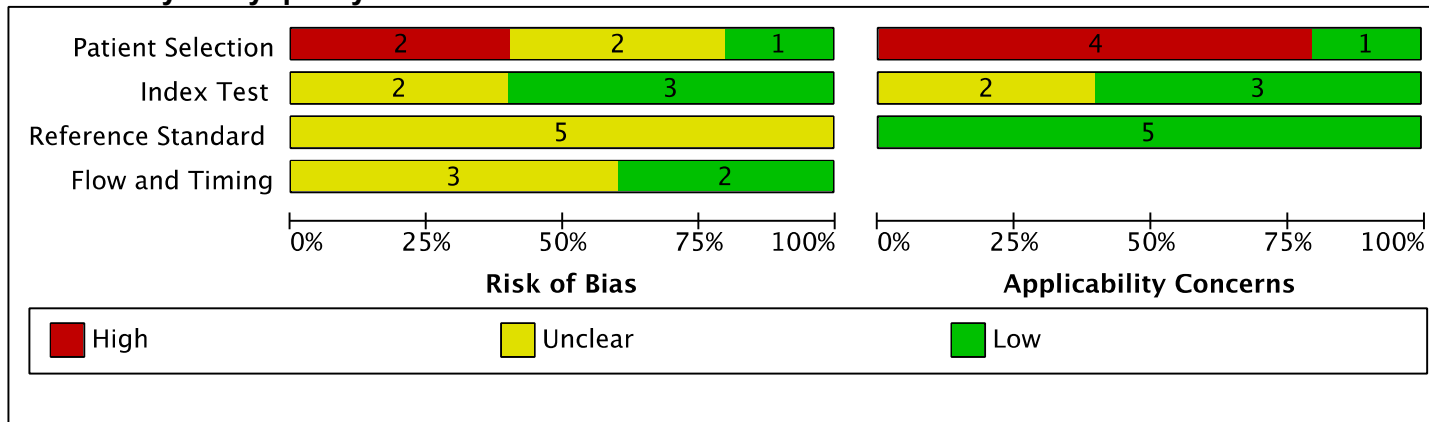

**B. Individual study quality.**

|                            | <u>Risk of Bias</u> |            |                    |                 | <u>Applicability Concerns</u> |            |                    |
|----------------------------|---------------------|------------|--------------------|-----------------|-------------------------------|------------|--------------------|
|                            | Patient Selection   | Index Test | Reference Standard | Flow and Timing | Patient Selection             | Index Test | Reference Standard |
| Bandyopadhyay 2011 (India) | ?                   | +          | ?                  | ?               | -                             | +          | +                  |
| Cho 2012 (S. Korea)        | -                   | ?          | ?                  | ?               | -                             | ?          | +                  |
| Lee 2011 (S. Korea)        | -                   | ?          | ?                  | ?               | -                             | +          | +                  |
| Sage 2010 (UK)             | +                   | +          | ?                  | +               | +                             | ?          | +                  |
| Wilson 2006 (S. Africa)    | ?                   | +          | ?                  | +               | -                             | +          | +                  |

  

|               |                  |              |
|---------------|------------------|--------------|
| <b>- High</b> | <b>? Unclear</b> | <b>+ Low</b> |
|---------------|------------------|--------------|

**Abbreviations:** S. Korea (South Korea); UK (United Kingdom).

**Supplementary Figure 2. Diagnostic accuracy of CRP for pulmonary tuberculosis among inpatients.**

| Study                      | TP | FP  | FN | TN | Sensitivity (95% CI) | Specificity (95% CI) | Sensitivity (95% CI) | Specificity (95% CI) |
|----------------------------|----|-----|----|----|----------------------|----------------------|----------------------|----------------------|
| Bandyopadhyay 2011 (India) | 5  | 14  | 4  | 29 | 0.56 [0.21, 0.86]    | 0.67 [0.51, 0.81]    |                      |                      |
| Cho 2012 (S. Korea)        | 23 | 20  | 17 | 13 | 0.57 [0.41, 0.73]    | 0.39 [0.23, 0.58]    |                      |                      |
| Lee 2011 (S. Korea)        | 67 | 175 | 15 | 15 | 0.82 [0.72, 0.89]    | 0.08 [0.04, 0.13]    |                      |                      |
| Sage 2010 (UK)             | 25 | 171 | 3  | 48 | 0.89 [0.72, 0.98]    | 0.22 [0.17, 0.28]    |                      |                      |
| Wilson 2006 (S. Africa)    | 25 | 2   | 1  | 0  | 0.96 [0.80, 1.00]    | 0.00 [0.00, 0.84]    |                      |                      |

**Abbreviations:** CRP (C-reactive protein)

**Legend:**

Pooled sensitivity: 78% (95% CI: 58-90); test for heterogeneity  $I^2 = 80\%$ ,  $p=0.001$

Pooled specificity: 21% (95% CI: 6-52); test for heterogeneity  $I^2 = 95\%$ ,  $p<0.0001$

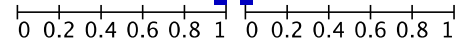

**Supplementary Figure 3. Diagnostic accuracy of CRP for pulmonary tuberculosis among inpatients stratified by HIV status.**

**A. HIV-infected inpatients**

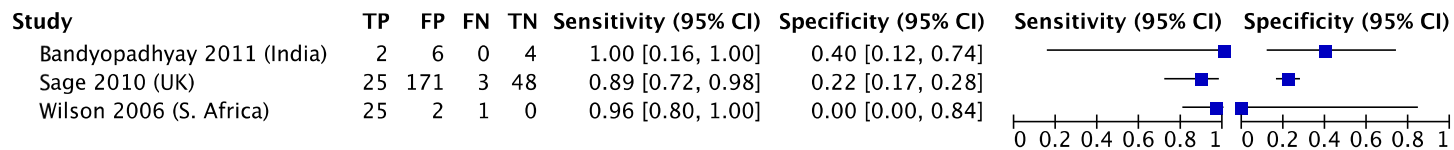

**B. HIV-uninfected inpatients**

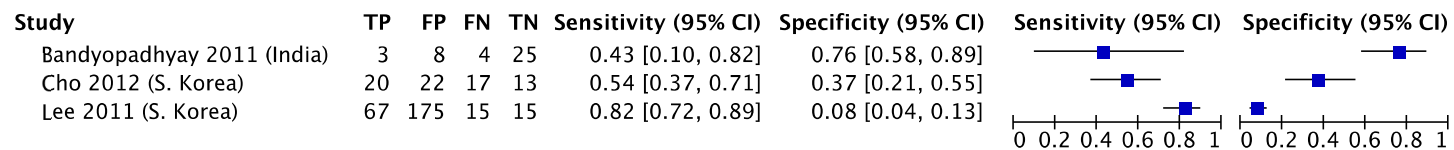

reactive protein)

Abbreviations: CRP (C-
